# Supplementary material for: Molecular Dynamic Simulation of the Porcine Pancreatic Lipase in Non-aqueous Organic Solvents
Source: PubMed Central journal article supplement (PMC7381131; doi:10.3389/fbioe.2020.00676), 2020-07-14
Supplement: Data_Sheet_1.pdf [file Data_Sheet_1.pdf]

## Supplementary Material

### 1 Supplementary Figures and Tables

#### 1.1 Supplementary Figures

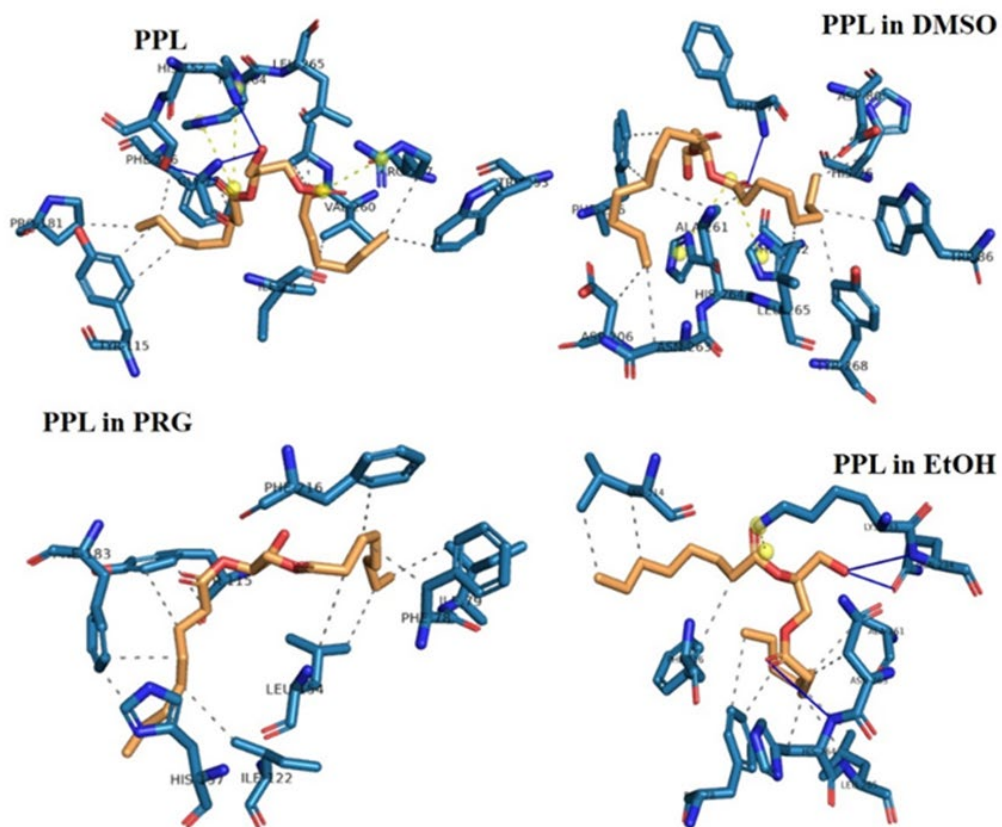

**Figure S1** PLIP analysis of PPL-DAG interaction.

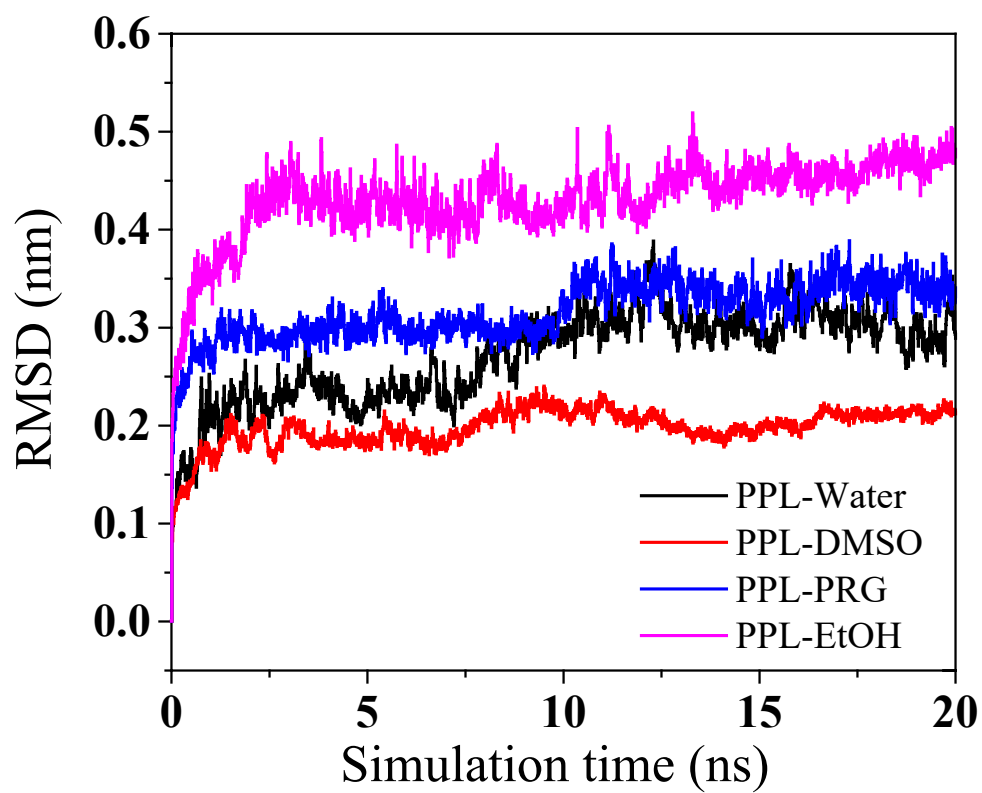

**Figure S2** Backbone RMSD of PPL in different solvents during the simulation.

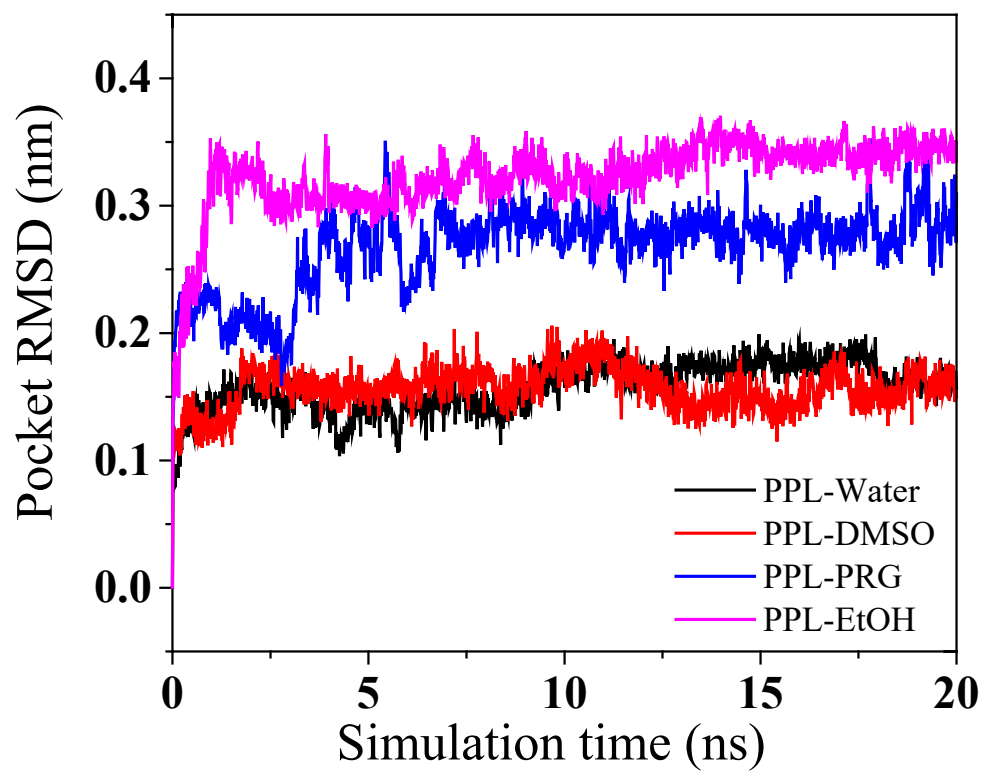

**Figure S3** Pocket RMSD of PPL in different solvents during the simulation.

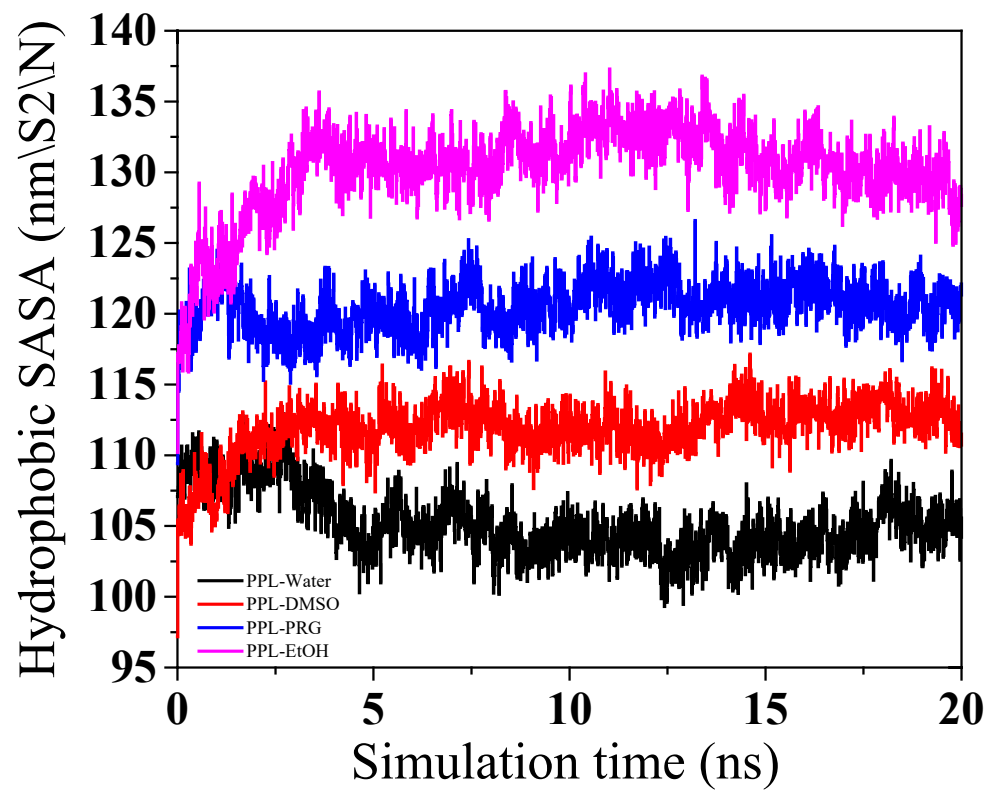

**Figure S4** Hydrophobic SASA of PPL in different solvents during the simulation.

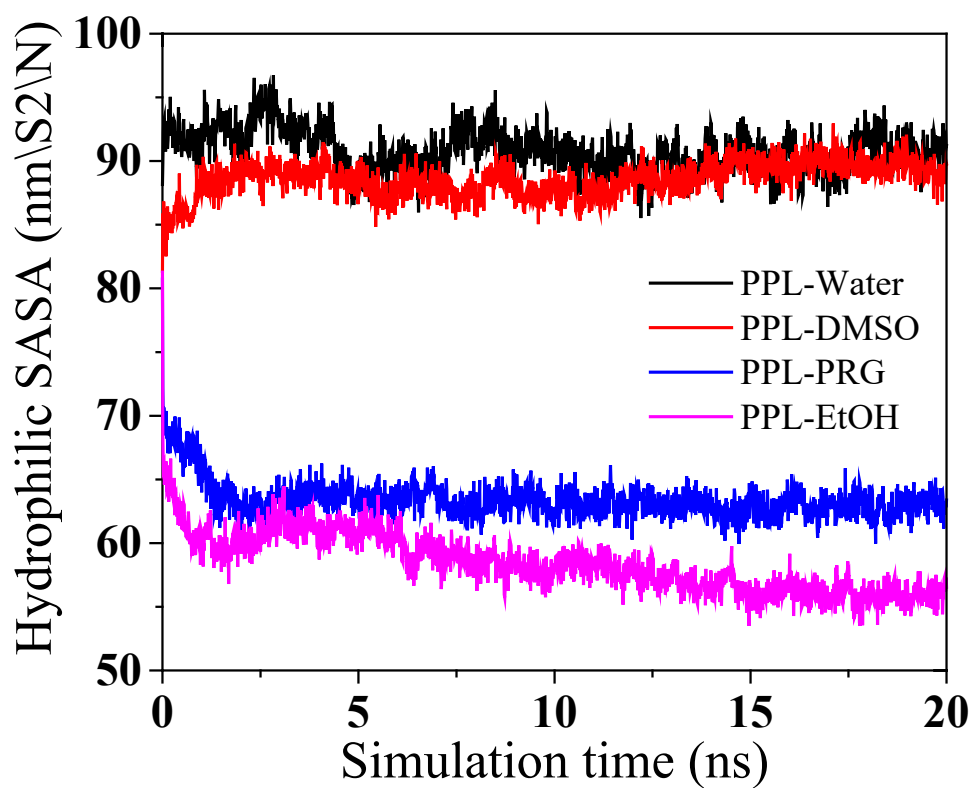

**Figure S5** Hydrophilic SASA of PPL in different solvents during the simulation.

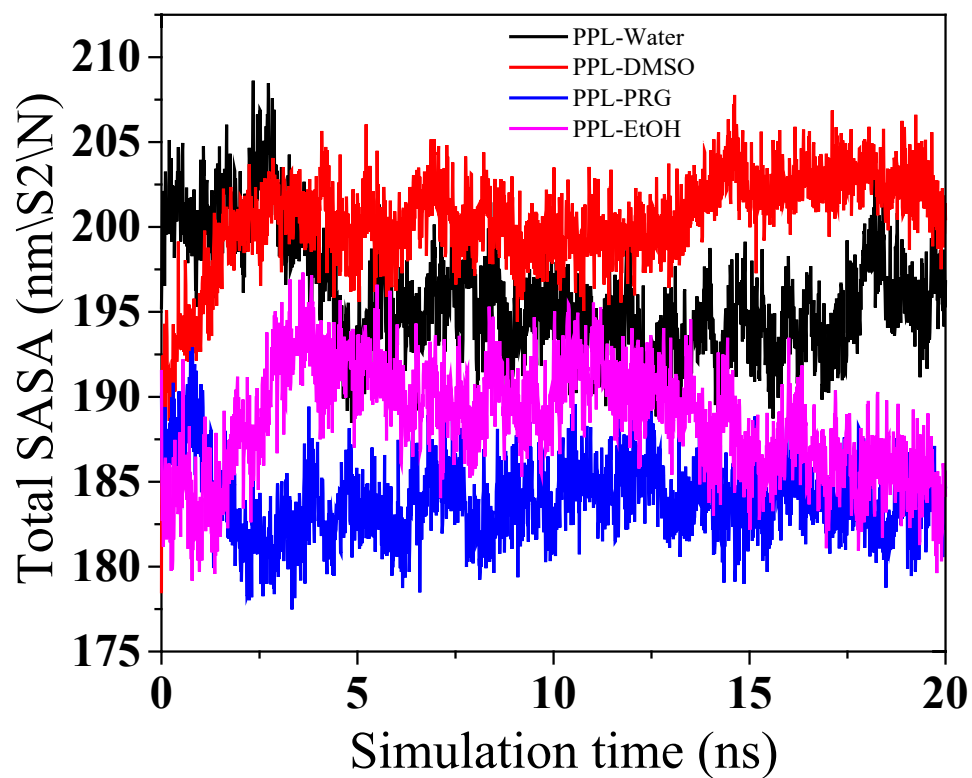

**Figure S6** Total SASA of PPL in different solvents during the simulation.

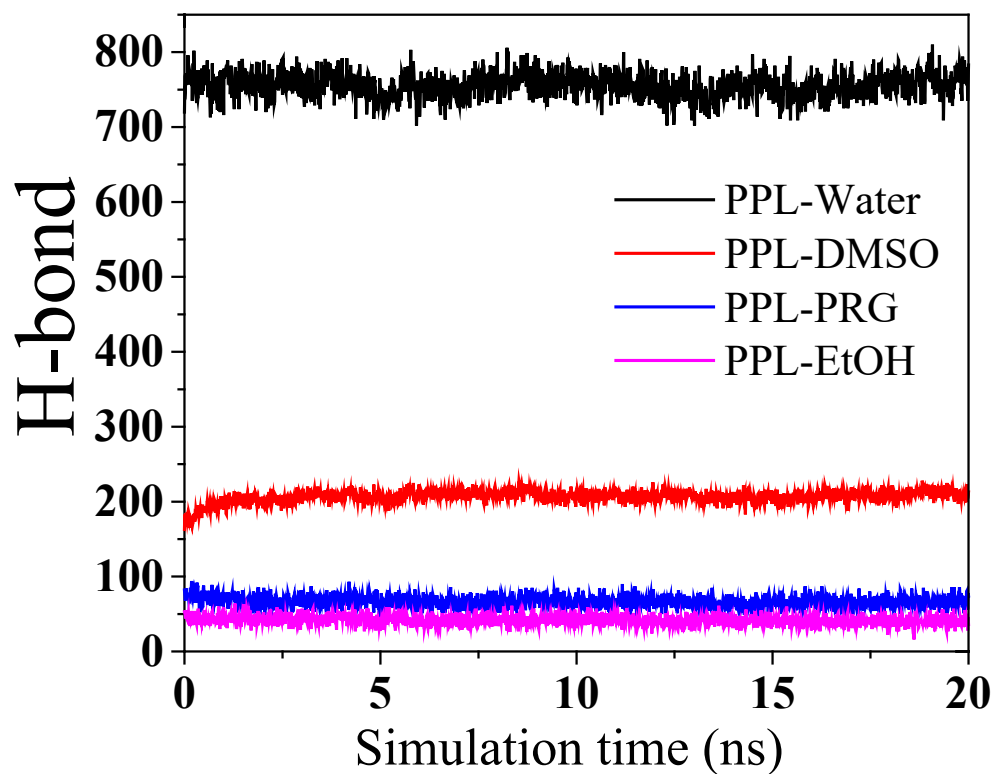

Figure S7 H-bond analysis of PPL between different solvents during the simulation.

## 1.2 Supplementary Tables

Table S1 Quantitative analysis of different solvents models.

| System   | Protein<br>(number) | Solvents<br>category | Solvents<br>(number) | Ions-NA <sup>+</sup><br>(number) |
|----------|---------------------|----------------------|----------------------|----------------------------------|
| PPL      | 1                   | Water                | 39977                | 7                                |
| PPL-DMSO | 1                   | DMSO                 | 10326                | 7                                |
| PPL-PRG  | 1                   | PRG                  | 5767                 | 7                                |
| PPL-EtOH | 1                   | EtOH                 | 9341                 | 7                                |

**Table S2** Ramachandran Plot Analysis of PPL in different solvents.

| Regions            | PPL | PPL-DMSO | PPL-PRG | PPL-EtOH |
|--------------------|-----|----------|---------|----------|
| Most Favoured      | 328 | 276      | 236     | 225      |
| Additional Allowed | 47  | 92       | 114     | 125      |
| Generously Allowed | 5   | 7        | 15      | 17       |
| Disallowed         | 2   | 7        | 17      | 15       |

**Table S3** Molecular docking analysis performed by Autodock Vina.

| PPL structure | Ligands | LogP  | Affinity (kcal/mol) |
|---------------|---------|-------|---------------------|
| PPL           |         | /     | -6.4                |
| PPL-DMSO      | DAG     | -1.39 | -6.1                |
| PPL-PRG       |         | -0.92 | -6.0                |
| PPL-EtOH      |         | -0.09 | -4.6                |

**Table S4** Enzyme- Substrate Interaction analysis by PLIP

|             | Hydrophobic Interactions                                                     | Hydrogen Bond         |
|-------------|------------------------------------------------------------------------------|-----------------------|
| PPL_crystal | Ile79, Tyr115, Pro181, Phe216,<br>Trp253, Arg 257, Val260,<br>Ala261, Leu265 | Gly77, His152, Ser153 |
| PPL-DMSO    | His76, Asp80, Trp86, Asp206,<br>Phe216, Ala261, Asn263,<br>Leu265, Tyr268    | Phe78                 |
| PPL-PRG     | Phe78, Ile79, Tyr115, Ile122,<br>Leu154, Phe183, Phe216                      | /                     |
| PPL-EtOH    | Phe78, Leu214, Phe216, Ala261,<br>Asn263, His264, Leu265,                    | Gln234, His264        |



**Table S5** G\_mmpbsa analysis of PPL-DAG complex in different solvents.

| PPL structure | van der Waal energy (KJ/mol) | Electrostatic energy (KJ/mol) | Polar solvation energy (KJ/mol) | SASA energy (KJ/mol) | Binding energy (KJ/mol) |
|---------------|------------------------------|-------------------------------|---------------------------------|----------------------|-------------------------|
| Water         | -185.326+/-38.107            | -15.526+/-7.797               | 76.232+/-35.079                 | -17.545+/-3.622      | -142.165+/-64.834       |
| DMSO          | -134.387+/-15.792            | -18.823+/-11.964              | 51.148+/-12.637                 | -13.676+/-1.289      | -115.737+/-14.157       |
| ETO           | -125.815+/-15.003            | -40.933+/-7.716               | 72.303+/-23.079                 | -10.631+/-1.903      | -105.076+/-27.058       |
| PRG           | -84.35+/-53.533              | -13.832+/-9.818               | 34.529+/-21.599                 | -8.563+/-4.576       | -72.215+/-49.967        |
